# Supplementary material for: Prognostic Role of TAPSE to PASP Ratio in Patients Undergoing MitraClip Procedure
Source: PubMed Central journal article supplement (PMC7958333; doi:10.3390/jcm10051006), 2021-03-02
Supplement: jcm-10-01006-s001.pdf [file jcm-10-01006-s001.pdf]

Supplementary Table 1. Baseline characteristics according to the combined endpoint.

|                                                        | No event (n=157) | Event (n=71)  | p-value |
|--------------------------------------------------------|------------------|---------------|---------|
| <b>Baseline clinical characteristics</b>               |                  |               |         |
| Age(years)                                             | 72.4±10.9        | 72.7±12.7     | 0.883   |
| Sex, male(n,%)                                         | 106(67.5)        | 48(67.6)      | 0.989   |
| Hypertension(n,%)                                      | 116(74.4)        | 49(69)        | 0.402   |
| Diabetes mellitus(n,%)                                 | 42(26.8)         | 32(45.1)      | 0.006   |
| Atrial fibrillation(n,%)                               | 87(55.8)         | 46(65.7)      | 0.104   |
| Glomerular filtration rate(ml/min/1.73m <sup>2</sup> ) | 62.3±25.7        | 57.5±24.8     | 0.870   |
| Stage 3b-5 chronic renal failure(n,%)                  | 47(29.9)         | 28(39.4)      | 0.287   |
| Ischemic heart disease(n,%)                            | 79(50.3%)        | 34(47.9)      | 0.942   |
| Prior PCI(n,%)                                         | 51(32.5)         | 25(35.2)      | 0.897   |
| Prior CABG(n,%)                                        | 29(18.5)         | 13(18.3)      | 0.846   |
| Extra cardiac arteriopathy(n,%)                        | 22(14)           | 13(18.3)      | 0.572   |
| Previous cardiac surgery(n,%)                          | 45(28.7)         | 17(23.9)      | 0.461   |
| COPD(n,%)                                              | 33(21)           | 16(22.5)      | 0.796   |
| FC NYHA III-IV/IV(n,%)                                 | 131(83.4)        | 67(94.4)      | 0.024   |
| EuroScore II                                           | 8.1±7.9          | 9.4±8         | 0.273   |
| STS Score                                              | 5.3±4.7          | 7.1±6.4       | 0.059   |
| NT-proBNP                                              | 5078.5±6721.9    | 4021.8±3721.4 | 0.226   |
| <b>Baseline echocardiographic parameters</b>           |                  |               |         |
| LVEDD(mm)                                              | 60.8±10.4        | 60.9±9.6      | 0.901   |
| LVESD(mm)                                              | 49.3±13.4        | 50.9±10.9     | 0.461   |
| Indexed LVEDV(ml/m <sup>2</sup> )                      | 91.3±31.5        | 94.3±41.4     | 0.588   |
| Indexed LVESV(ml/m <sup>2</sup> )                      | 53.8±29.3        | 60.9±34.9     | 0.173   |
| LVEF(%)                                                | 41.4±15.7        | 38.2±14.2     | 0.143   |
| Indexed LA volume(ml/m <sup>2</sup> )                  | 59.2±23.6        | 62.8±25.6     | 0.384   |
| MR grade IV/IV(n,%)                                    | 126(80.3)        | 61(85.9)      | 0.439   |

|                                                      |           |           |       |
|------------------------------------------------------|-----------|-----------|-------|
| Regurgitant Volume(ml)                               | 58.2±21.1 | 63.9±26.7 | 0.383 |
| Effective Regurgitant Orifice(mm2)                   | 43.6±18.2 | 41.7±15.9 | 0.609 |
| Indexed LVEDV/ Effective Regurgitant Orifice(ml/mm2) | 2.4±1.3   | 2.5±1.6   | 0.769 |
| MR etiology(n,%)*                                    |           |           | 0.160 |
| - Primary                                            | 39(25.2)  | 11(15.7)  |       |
| - Secondary                                          | 95(61.3)  | 52(74.3)  |       |
| - Mixed                                              | 21(13.5)  | 7(10)     |       |
| Tricuspid regurgitation(n,%)                         |           |           | 0.424 |
| - Grade 0-1                                          | 73(46.5)  | 25(35.2)  |       |
| - Grade 2                                            | 36(22.9)  | 21(29.6)  |       |
| - Grade 3                                            | 31(19.7)  | 15(21.1)  |       |
| - Grade 4                                            | 17(10.8)  | 10(14.1)  |       |
| TAPSE(mm)                                            | 17.4±4.2  | 16±4.4    | 0.017 |
| PASP(mmHg)                                           | 48±14.7   | 50.9±13.8 | 0.176 |
| TAPSE/PASP ratio                                     | 0.41±0.19 | 0.33±0.13 | 0.003 |
| <b>Right heart catheterization <sup>ϕ</sup></b>      |           |           |       |
| Right atrial mean pressure(mmHg)                     | 10.3±6    | 6.9±3.7   | 0.116 |
| LA mean pressure(mmHg)                               | 17.9±8.4  | 26.9±29.2 | 0.213 |
| Left atrial V-wave pressure(mmHg)                    | 36.7±16.3 | 34.4±15.9 | 0.684 |
| Change in LA mean pressure(mmHg)                     | 4.9±7.2   | 8.1±6.5   | 0.203 |
| Change in LA v-wave pressure(mmHg)                   | 17.8±16.1 | 13.5±10.8 | 0.431 |
| PCWP pressure(mmHg)                                  | 18.2±7.5  | 19.6±7.3  | 0.629 |
| Mean PA pressure(mmHg)                               | 28.7±10.2 | 32.9±13.9 | 0.389 |
| Systolic PA pressure(mmHg) <sup>γ</sup>              | 43.9±15.6 | 54±21.4   | 0.054 |
| PA Pulse Pressure(mmHg)                              | 23.6±6.8  | 30.9±15.9 | 0.218 |
| Cardiac index(ml/min/m2)                             | 2.1±0.6   | 2.3±0.7   | 0.303 |
| Pulmonary vascular resistance(WU)                    | 3.2±1.4   | 2.9±1.2   | 0.623 |
| Transpulmonary pressure gradient(mmHg)               | 10.8±3.4  | 13.7±9.1  | 0.257 |

|                                   |         |         |       |
|-----------------------------------|---------|---------|-------|
| Diastolic pressure gradient(mmHg) | 2.5±2.6 | 3.2±4.1 | 0.585 |
| PA compliance(ml/mmHg)            | 2.4±0.9 | 2.6±1.7 | 0.680 |

\*values for 225 patients. <sup>φ</sup>values for 26 patients. <sup>γ</sup>values for 51 patients.

CABG:coronary artery bypass graft. COPD:chronic obstructive pulmonary disease. LA:left atrial. LVEDD:left ventricular end-diastolic diameter. LVEDV:left ventricular end-diastolic volume. LVEF:left ventricular ejection fraction. LVESD:left ventricular end-systolic diameter. LVESV:left ventricular end-systolic volume. MR:mitral regurgitation. PA:pulmonary artery. PASP:pulmonary artery systolic pressure. PCI:percutaneous coronary intervention. PCW:pulmonary capillary wedge. STS:Society of Thoracic Surgery. TAPSE:tricuspid annular plane systolic excursion. WU:wood unit.

**Supplementary Table 2. Procedural and 30-day outcomes according to the combined endpoint.**

|                                                         | No event (n=157) | Event (n=71) | Total sample<br>(n=228) | p-value |
|---------------------------------------------------------|------------------|--------------|-------------------------|---------|
| Number of clips                                         | 1.5±0.6          | 1.4±0.7      | 1.5±0.6                 | 0.517   |
| Device time (minutes)                                   | 81.3±38.9        | 73.2±24.7    | 78.6±34.9               | 0.171   |
| Procedural time (minutes)                               | 144.3±52.2       | 142.4±69.6   | 143.7±57.7              | 0.846   |
| Inotropic treatment (n, %)                              | 16(10.2)         | 11(15.5)     | 27(11.8)                | 0.500   |
| IABP (n, %)                                             | 8(5.1)           | 3(4.2)       | 11(4.8)                 | 0.815   |
| Postprocedural MR (n, %)                                |                  |              |                         | 0.897   |
| 0-I/IV                                                  | 100(63.7%)       | 47(66.2%)    | 147(64.5)               |         |
| II/IV                                                   | 57(36.3%)        | 24(33.8%)    | 81(35.5)                |         |
| <b>Periprocedural complications and 30-day outcomes</b> |                  |              |                         |         |
| Pericardial effusion (n, %)                             | 1(0.6)           | 0            | 1(0.4)                  | 0.500   |
| Air embolism (n, %)                                     | 2(1.3)           | 0            | 2(0.9)                  | 0.569   |
| Cordal rupture (n, %)                                   | 1(0.6)           | 0            | 1(0.4)                  | 0.689   |
| Cordal entrapment (n, %)                                | 1(0.6)           | 0            | 1(0.4)                  | 0.689   |
| Catheter thrombosis (n, %)                              | 0                | 0            | 0                       | 1.0     |
| Clip detachment (n, %)                                  | 1(0.6)           | 0            | 1(0.4)                  | 0.689   |
| BARC bleeding (n, %)                                    |                  |              |                         | 0.148   |
| - Type II                                               | 2(1.3)           | 2(2.8)       | 4(1.8)                  |         |
| - Type III a-b                                          | 5(3.1)           | 1(1.4)       | 6(2.6)                  |         |
| Access-site vascular complications<br>(n, %)            |                  |              |                         |         |
| - Pseudoaneurism and AV<br>fistula                      | 3(1.9)           | 1(1.4)       | 4(1.8)                  | 0.632   |
| - Vascular surgery                                      | 4(2.5)           | 0            | 4(1.8)                  | 0.222   |
| Acute kidney injury (n, %)                              | 1(0.6)           | 1(1.4)       | 2(0.9)                  | 0.527   |
| Stroke (n, %)                                           | 0                | 1(1.4)       | 1(0.4)                  | 0.311   |
| Pulmonary thromboembolism (n, %)                        | 1(0.6)           | 0            | 1(0.4)                  | 0.689   |
| Gastrointestinal BARC 3a<br>haemorrhage (n, %)          | 2(1.3)           | 0            | 2(0.9)                  | 0.569   |

|                                                 |          |          |          |        |
|-------------------------------------------------|----------|----------|----------|--------|
| Nosocomial pneumonia (n, %)                     | 0        | 2(2.8)   | 2(0.9)   | 0.096  |
| In-hospital death (n, %)                        | 0        | 2(2.8)   | 2(0.9)   | 0.035  |
| 30-day readmission for HF (n, %)                | 0        | 6(8.5)   | 6(2.6)   | <0.001 |
| Peri-procedural and 30-day complications (n, %) | 17(10.8) | 10(14.1) | 27(11.8) | 0.481  |

AV: arterio-venous. BARC: Bleeding Academic Research Consortium. HF: heart failure. IABP: intra-aortic balloon pump. MR: mitral regurgitation.

**Supplementary Table 3.** Follow-up TAPSE/PASP ratio determinations after successful transcatheter mitral valve repair.

|                                          | <b>Preprocedural<br/>TAPSE/PASP ≤0.35</b> | <b>Preprocedural<br/>TAPSE/PASP &gt;0.35</b> | <b>p-value</b> |
|------------------------------------------|-------------------------------------------|----------------------------------------------|----------------|
| Postprocedural TAPSE/PASP ≤0.35          | 22(34.9)                                  | 10(16.4)                                     | 0.018          |
| Postprocedural TAPSE/PASP >0.35          | 41(65.1)                                  | 51(83.6)                                     |                |
| Improvement in postprocedural TAPSE/PASP | 55(87.3)                                  | 25(41)                                       | 0.001          |
| Worsening in postprocedural TAPSE/PASP   | 8(12.7)                                   | 36(59)                                       |                |

PASP: pulmonary artery systolic pressure. TAPSE: tricuspid annular plane excursion.
